# Supplementary material for: Current Status and Future Projection of Soil Erosion Based on RUSLE, Landscape Ecology and Deep Learning Technologies: Observations from a Tropical River Basin in Eastern India
Source: Research Square preprint supplement (doi:10.21203/rs.3.rs-3466554/v1), 2023-11-30
Supplement: Supplementary file 1 [file 13e97da2ceb12608d5627462.docx]

| **Year** | **>5**  **(Very Low)** | **5-10**  **(Low)** | **10-20**  **(Moderate)** | **20-30**  **(High)** | **>30**  **(Very High)** |
| --- | --- | --- | --- | --- | --- |
| **2011** | 5904050 | 1852504 | 1108304 | 849202 | 308976 |
| **2031** | 4305340 | 2418527 | 1620882 | 1106088 | 571051 |
| **2041** | 3329141 | 2785079 | 1886447 | 1186739 | 833547 |
| **2051** | 2736223 | 3008745 | 2005837 | 1206653 | 1062757 |
| **2061** | 2375952 | 3133452 | 2048672 | 1208762 | 1252826 |
| **2071** | 2154910 | 3193081 | 2055625 | 1208189 | 1407466 |

*Table 5. Number of pixels in each erosion category for the successive years*
