# Supplementary material for: Current Status and Future Projection of Soil Erosion Based on RUSLE, Landscape Ecology and Deep Learning Technologies: Observations from a Tropical River Basin in Eastern India
Source: Research Square preprint supplement (doi:10.21203/rs.3.rs-3466554/v1), 2023-11-30
Supplement: Supplementary file 2 [file 1d92c900c00de8045ef8e975.docx]

| **Index** | **Erosion classes** | **Soil loss (t h-1 y-1)** | **Percentage** |
| --- | --- | --- | --- |
| <5 | Very Low | < 5 | 23.663 |
| 5-10 | Low | 5-10 | 31.330 |
| 10-20 | Moderate | 10-20 | 23.248 |
| 20-30 | High | 20-30 | 9.543 |
| >30 | Very High | >30 | 12.535 |

*Table 3. Area and Percentage of various soil loss categories in the Mayurakshi River Basin*
