# Supplementary material for: Current Status and Future Projection of Soil Erosion Based on RUSLE, Landscape Ecology and Deep Learning Technologies: Observations from a Tropical River Basin in Eastern India
Source: Research Square preprint supplement (doi:10.21203/rs.3.rs-3466554/v1), 2023-11-30
Supplement: Supplementary file 3 [file 97a4e035777463214bd5c032.docx]

*Table 2. Landscape metrices and their calculations*

| **Landscape Metrics** | **Formula** | **Notations** | **Role** |
| --- | --- | --- | --- |
| PATCH NUMBER (PN) | PN = Ni | Ni = Number of patches in the landscape of patch type i | Increase in the PN indicates fragmentation and decrease represents clustering |
| PATCH DENSITY (PDc) Class Level | PDc = | Ai = Area of the class unit | PDc of a class tends to increase when the number of patches increase and vice versa |
| PATCH DENSITY (PDl)  Landscape Level | PDl = | Al = Area of the landscape unit | PDl tends to increase when the number of patches of different types in the landscape decrease, i.e., a particular patch dominates the landscape and vice versa. |
| CLASS AREA PROPORTION (CAP) | CAPi = | CAPi = Class Area Proportion of the ith landscape type, aij = Area of patch j, A = Total landscape area | Temporal increase in CAPi implies that the type I becomes more frequent in the region |
| MEAN PATCH SIZE (AREA_MN) | AREA_MNi = | AREA_MNi = Mean Patch Size of the type I, aij = Area of patch ij, ni = Number of patches in the landscape of the patch type ij | Smaller values of AREA_MN represents fragmented landscape |
| RADIUS OF GYRATION (GYRATE) | GYRATE = | GYRATEi = Mean distance between each cell in a patch i and the centroid of the patch i, hijr = distance between cell ijr (in patch ij) and the centroid of patch ij (the average location) based on cell-centre-to-cell | GYRATE = 0 when the patch consists of single cell and increases as the patch becomes larger in extent |
| RADIUS OF GYRATION AREA WEIGHTED MEAN (GYRATE_AM) | GYRATE_AM = | GYRATEi = Radius of gyration of patch I and CAPi = Class Area Proportion of patch i | Large values of GYRATE_AM indicates more connected and less subdivided patches |
| PERIMETER AREA RATIO (PARA) | PARA = (PP/PA) | PP = Perimeter of the patch, PA = Area of the patch | Higher PARA values mean decrease of patch size i.e., fragmentation |
| SHAPE INDEX (SHAPE) | SHAPE = | pij = Perimeter of patch ij, minpij = Minimum perimeter of patch ij in terms of the number of cell edges | Measure of compactness with the value of 1 for a perfectly compact patch and increasing with decreasing compactness |
| FRACTAL DIMENSION (Di) | Di = | Pi = Perimeter of patch I, and A = Area of patch i | For a well-defined regular patch, the value of Di = 1 and increases with greater complexity and irregularity |
| RELATED CIRCUMSCRIBING CIRCLE (RCC) | RCC = aij / Cij | aij = Area of the patch ij, Cij = Area of the smallest circumscribing circle | High RCC values indicate circular patch and lower values represent elongated patch |
