# Supplementary material for: Current Status and Future Projection of Soil Erosion Based on RUSLE, Landscape Ecology and Deep Learning Technologies: Observations from a Tropical River Basin in Eastern India
Source: Research Square preprint supplement (doi:10.21203/rs.3.rs-3466554/v1), 2023-11-30
Supplement: Supplementary file 4 [file bc85a599e0489379adafee97.docx]

| **Erosion Type**  **(ton/ha/year)** | **<5** | **5-10** | **10-20** | **20-30** | **>30** |
| --- | --- | --- | --- | --- | --- |
| **< 5** | 57645 | 12782 | 9432 | 7852 | 2211 |
| **5-10** | 1249 | 5172 | 551 | 75 | 15 |
| **10-20** | 13 | 446 | 923 | 167 | 76 |
| **20-30** | 3 | 42 | 153 | 291 | 133 |
| **>30** | 0 | 4 | 39 | 95 | 681 |
| **Total** | **58910** | **18446** | **11098** | **8480** | **3116** |

*Table 4. Conversion Metrics 2011 to 2021 soil erosion risk*
