# Supplementary material for: Current Status and Future Projection of Soil Erosion Based on RUSLE, Landscape Ecology and Deep Learning Technologies: Observations from a Tropical River Basin in Eastern India
Source: Research Square preprint supplement (doi:10.21203/rs.3.rs-3466554/v1), 2023-11-30
Supplement: Supplementary file 5 [file dac5d9a9049e7df2965fc8d7.docx]

| **Type** | **Value** |
| --- | --- |
| Dense Vegetation | 0.8 |
| Light Vegetation | 0.8 |
| Built up area | 2 |
| Agricultural land | 0.5 |
| Water Body | 1 |
| Fallow Land | 0.9 |

*Source: USDA Handbook No 282 (1981)*

*Table.1 Values of P factor respected Land use/ Land cover type*
